# Supplementary material for: Memory T Cells in Latent Mycobacterium tuberculosis Infection Are Directed against Three Antigenic Islands and Largely Contained in a CXCR3+CCR6+ Th1 Subset
Source: PLoS Pathog. 2013 Jan 24;9(1):e1003130. doi: 10.1371/journal.ppat.1003130 (PMC3554618; doi:10.1371/journal.ppat.1003130)
Supplement: Table S4 — Summary of characteristics of antigens recognized by more than 10% of LTBI donors according to magnitude of response. (XLS) [file ppat.1003130.s007.xls]

## Sheet: Sheet1
Table S4. Summary of characteristics of antigens recognized by more than 10% of LTBI donors according to magnitude of response.
Novel antigen	Rv-number	Resp. freq.	Total SFC	Protein category	Location	T7SS
-	Rv3615c	0.285714	3710	Cell wall and cell processes	Non-island	Esx-1
-	Rv0288	0.642857	2455	Cell wall and cell processes	Island 1	Esx-3
-	Rv3019c	0.642857	2455	Cell wall and cell processes	Island 2	-
Yes	Rv0289	0.285714	2298.33	Cell wall and cell processes	Island 1	Esx-3
-	Rv0287	0.357143	2043.33	Cell wall and cell processes	Island 1	Esx-3
-	Rv3020c	0.357143	2043.33	Cell wall and cell processes	Island 2	-
-	Rv3874	0.25	1715	Cell wall and cell processes	Island 3	Esx-1
Yes	Rv3024c	0.321429	1630	Information pathways	Island 2	-
Yes	Rv3330	0.285714	1595	Cell wall and cell processes	Non-island	-
Yes	Rv0290	0.285714	1551.67	Cell wall and cell processes	Island 1	Esx-3
-	Rv3018c	0.464286	1427.82	PE/PPE	Island 2	-
Yes	Rv0294	0.178571	1368.33	Intermediary metabolism and respiration	Island 1	-
Yes	Rv3876	0.178571	1323.33	Cell wall and cell processes	Island 3	Esx-1
-	Rv3021c	0.464286	1169.48	PE/PPE	Island 2	-
Yes	Rv0291	0.142857	1153.33	Intermediary metabolism and respiration	Island 1	Esx-3
Yes	Rv0293c	0.142857	1073.33	Conserved hypotheticals	Island 1	-
-	Rv3875	0.214286	1061.67	Cell wall and cell processes	Island 3	Esx-1
-	Rv3015c	0.178571	910	Conserved hypotheticals	Non-island	-
Yes	Rv2874	0.178571	797.5	Intermediary metabolism and respiration	Non-island	-
Yes	Rv0298	0.107143	783.333	Conserved hypotheticals	Non-island	-
Yes	Rv0292	0.142857	708.333	Cell wall and cell processes	Island 1	Esx-3
-	Rv0453	0.357143	672.063	PE/PPE	Non-island	-
-	Rv1808	0.214286	626.894	PE/PPE	Non-island	-
-	Rv3136	0.214286	619.275	PE/PPE	Non-island	-
-	Rv3418c	0.214286	591.667	Virulence, detoxification, adaptation	Non-island	-
-	Rv2123	0.357143	578.218	PE/PPE	Non-island	-
-	Rv1802	0.214286	545.452	PE/PPE	Non-island	-
-	Rv0280	0.321429	523.373	PE/PPE	Non-island	-
-	Rv0256c	0.321429	482.54	PE/PPE	Non-island	-
Yes	Rv0299	0.142857	466.667	Conserved hypotheticals	Non-island	-
Yes	Rv3025c	0.142857	423.333	Intermediary metabolism and respiration	Island 2	-
-	Rv1789	0.178571	394.478	PE/PPE	Non-island	Esx-5
-	Rv1196	0.214286	376.667	PE/PPE	Non-island	-
-	Rv0286	0.285714	356.429	PE/PPE	Island 1	Esx-3
Yes	Rv1791	0.25	355.139	PE/PPE	Non-island	Esx-5
-	Rv2892c	0.142857	354.063	PE/PPE	Non-island	-
Yes	Rv1788	0.25	346.991	PE/PPE	Non-island	Esx-5
-	Rv0129c	0.25	321.111	Lipid metabolism	Non-island	-
-	Rv1387	0.25	317.262	PE/PPE	Non-island	-
Yes	Rv3135	0.178571	317.116	PE/PPE	Non-island	-
Yes	Rv1366	0.107143	308.333	Conserved hypotheticals	Non-island	-
-	Rv1706c	0.107143	303.227	PE/PPE	Non-island	-
-	Rv1047	0.357143	300.611	Insertion sequences and phages	Non-island	-
-	Rv1199c	0.357143	300.611	Insertion sequences and phages	Non-island	-
-	Rv2512c	0.357143	300.611	Insertion sequences and phages	Non-island	-
-	Rv3023c	0.357143	300.611	Insertion sequences and phages	Island 2	-
-	Rv3115	0.357143	300.611	Insertion sequences and phages	Non-island	-
-	Rv2873	0.214286	263.333	Cell wall and cell processes	Non-island	-
-	Rv3621c	0.142857	256.23	PE/PPE	Non-island	-
-	Rv1886c	0.25	249.878	Lipid metabolism	Non-island	-
Yes	Rv1172c	0.107143	237.083	PE/PPE	Non-island	-
Yes	Rv3012c	0.142857	233.333	Information pathways	Non-island	-
Yes	Rv0690c	0.107143	233.333	Conserved hypotheticals	Non-island	-
-	Rv1705c	0.142857	231.944	PE/PPE	Non-island	-
Yes	Rv0442c	0.107143	231.667	PE/PPE	Non-island	-
-	Rv2875	0.214286	228.333	Cell wall and cell processes	Non-island	-
-	Rv3873	0.214286	226.637	PE/PPE	Island 3	Esx-1
-	Rv2666	0.214286	203.611	Insertion sequences and phages	Non-island	-
-	Rv3804c	0.214286	184.878	Lipid metabolism	Non-island	-
-	Rv2823c	0.107143	184.167	Conserved hypotheticals	Non-island	-
Yes	Rv0124	0.142857	177.05	PE/PPE	Non-island	-
Yes	Rv0297	0.142857	153.717	PE/PPE	Non-island	-
-	Rv1198	0.107143	151.211	Cell wall and cell processes	Non-island	-
-	Rv1793	0.107143	151.104	Cell wall and cell processes	Non-island	Esx-5
-	Rv2346c	0.107143	151.104	Cell wall and cell processes	Non-island	-
-	Rv1037c	0.107143	140.1	Cell wall and cell processes	Non-island	-
-	Rv3619c	0.107143	140.1	Cell wall and cell processes	Non-island	-
Yes	Rv0987	0.107143	133.333	Cell wall and cell processes	Non-island	-
Yes	Rv3125c	0.214286	124.722	PE/PPE	Non-island	-
-	Rv1800	0.178571	117.619	PE/PPE	Non-island	-
Yes	Rv1243c	0.107143	114.272	PE/PPE	Non-island	-
Yes	Rv3022c	0.178571	108.889	PE/PPE	Island 2	-
Yes	Rv1317c	0.107143	96.6667	Information pathways	Non-island	-
Yes	Rv1441c	0.107143	85.5556	PE/PPE	Non-island	-
Yes	Rv2853	0.107143	85	PE/PPE	Non-island	-
Yes	Rv0985c	0.107143	70	Cell wall and cell processes	Non-island	-
Yes	Rv2490c	0.107143	63.7169	PE/PPE	Non-island	-
-	Rv1361c	0.107143	56.6667	PE/PPE	Non-island	-
-	Rv3478	0.107143	56.6667	PE/PPE	Non-island	-
Yes	Rv0278c	0.107143	45.1058	PE/PPE	Non-island	-
Yes	Rv0279c	0.107143	45.1058	PE/PPE	Non-island	-
-	Rv2608	0.107143	43.3333	PE/PPE	Non-island	-
